# Supplementary material for: Access to Information and Communication Technology, Digital Skills, and Perceived Well-Being among Older Adults in Hong Kong
Source: MDPI journal article supplement (doi:10.3390/ijerph20136208), 2023-06-23
Supplement: s1 [file s1]

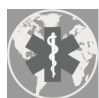

Tables of data analysis

Table S1. Sample characteristics and gender differences in major variables (N = 1018)

| Variables                   | Total |      | Male (n = 358) |      | Female (n = 660) |      | t             | p      |
|-----------------------------|-------|------|----------------|------|------------------|------|---------------|--------|
|                             | M     | SD   | M              | SD   | M                | SD   |               |        |
| Age <sup>a</sup>            | 72.86 | 8.74 | 72.46          | 8.84 | 73.10            | 8.69 | −1.010        | 0.313  |
| Numbers of devices          | 1.54  | 1.20 | 1.85           | 1.30 | 1.38             | 1.11 | 6.102         | <0.001 |
| Variables                   | %     |      | %              |      | %                |      | χ2 (df)       | p      |
| Education level             |       |      |                |      |                  |      | 52.977<br>(7) | <0.001 |
| Never attend                | 7.6%  |      | 4.2%           |      | 9.4%             |      |               |        |
| Primary school              | 25.9% |      | 17.3%          |      | 30.6%            |      |               |        |
| Secondary school            | 17.8% |      | 17.9%          |      | 17.7%            |      |               |        |
| Associate degree            | 24.1% |      | 27.4%          |      | 22.3%            |      |               |        |
| Bachelor's degree           | 7.7%  |      | 12.8%          |      | 4.8%             |      |               |        |
| Master's degree or above    | 8.9%  |      | 11.7%          |      | 7.4%             |      |               |        |
| Self-perceived class status |       |      |                |      |                  |      | 12.178<br>(5) | 0.032  |
| Upper class                 | 0.7%  |      | 1.6%           |      | .2%              |      |               |        |
| Upper middle class          | 3.5%  |      | 3.4%           |      | 3.5%             |      |               |        |
| Middle class                | 26.9% |      | 27.1%          |      | 26.8%            |      |               |        |
| Lower middle class          | 20.8% |      | 24.6%          |      | 18.7%            |      |               |        |
| Grassroot                   | 34.4% |      | 31.5%          |      | 35.9%            |      |               |        |
| Refuse to answer            | 13.8% |      | 11.8%          |      | 14.8%            |      |               |        |

Notes

<sup>a</sup> N = 305 and 517, respectively, for male and female participants; <sup>b</sup> N = 257 and 391, respectively, for male and female participants

Table S2. Material access to ICT, frequency of access and gender differences

|                                                   |  |  | Total |       | Male (n = 358) |       | Female (n = 660) |       |                     |            |        |
|---------------------------------------------------|--|--|-------|-------|----------------|-------|------------------|-------|---------------------|------------|--------|
| Variables                                         |  |  | M     | SD    | M              | SD    | M                | SD    | t                   | p          |        |
| Internet usage <sup>b</sup>                       |  |  | 11.37 | 2.21  | 10.98          | 2.17  | 11.62            | 2.21  | −3.636              | <0.001     |        |
| Digital skills <sup>b</sup>                       |  |  | 81.03 | 28.28 | 86.90          | 27.06 | 77.17            | 28.44 | 4.345               | <0.001     |        |
| Variables                                         |  |  | %     |       | %              |       | %                |       | χ <sup>2</sup> (df) | p          |        |
| Living alone                                      |  |  | 24.7% |       | 21.8%          |       | 26.2%            |       | 2.850 (2)           | 0.240      |        |
| Digital device                                    |  |  |       |       |                |       |                  |       |                     |            |        |
| Desktop                                           |  |  | 24.4% |       | 13.2%          |       | 11.2%            |       | 51.18(1)            | 0.000      |        |
| Laptop                                            |  |  | 23.6% |       | 11.4%          |       | 12.2%            |       | 23.877(1)           | 0.000      |        |
| Mobile phone                                      |  |  | 78.2% |       | 28.7%          |       | 49.5%            |       | 3.681(1)            | 0.055      |        |
| Tablet                                            |  |  | 28.1% |       | 11.8%          |       | 16.3%            |       | 8.045(1)            | 0.005      |        |
| None of these                                     |  |  | 18.2% |       | 5.3%           |       | 12.9%            |       | 3.133(1)            | 0.077      |        |
| Internet access at home or mobile phone data plan |  |  |       |       |                |       |                  |       |                     | 26.866 (2) | <0.001 |
| None                                              |  |  | 23.5% |       | 19.0%          |       | 25.9%            |       |                     |            |        |
| Either                                            |  |  | 23.2% |       | 16.8%          |       | 26.7%            |       |                     |            |        |
| Both                                              |  |  | 53.3% |       | 64.2%          |       | 47.4%            |       |                     |            |        |
| Frequency of Internet access                      |  |  |       |       |                |       |                  |       |                     | 22.525 (5) | <0.001 |
| Never                                             |  |  | 36.3% |       | 28.2%          |       | 40.8%            |       |                     |            |        |
| Less than once a month                            |  |  | 1.8%  |       | 1.1%           |       | 2.1%             |       |                     |            |        |
| Once a month                                      |  |  | 1.6%  |       | 1.4%           |       | 1.7%             |       |                     |            |        |
| Once a week                                       |  |  | 4.0%  |       | 3.1%           |       | 4.5%             |       |                     |            |        |
| Every day                                         |  |  | 8.6%  |       | 10.6%          |       | 7.6%             |       |                     |            |        |
| Several times per day                             |  |  | 47.6% |       | 55.6%          |       | 43.3%            |       |                     |            |        |
| Any purely online friendship                      |  |  | 6.1%  |       | 8.9%           |       | 4.5%             |       | 7.832 (1)           | 0.005      |        |

Notes

<sup>a</sup> N = 305 and 517, respectively, for male and female participants<sup>b</sup> N = 257 and 391, respectively, for male and female participants

Table S3. Frequency of perceived easiness of digital usage (response = easy or very easy) and gender differences

| Perceived easiness                                                                                                                  | Total (N = 648) | Male (N = 257) | Female (N = 391) |
|-------------------------------------------------------------------------------------------------------------------------------------|-----------------|----------------|------------------|
| Q11. Adjust the screen brightness.                                                                                                  | 76.40%          | 83.30%         | 71.9% ***        |
| Q10. Navigate onscreen menus using the touchscreen                                                                                  | 75.60%          | 76.30%         | 75.20%           |
| Q25. Read the news on the Internet.                                                                                                 | 69.30%          | 76.70%         | 64.5% ***        |
| Q21. Use search engines (e.g. Google, Bing).                                                                                        | 68.50%          | 74.30%         | 64.70%           |
| Q23. Find information about my hobbies and interests on the Internet.                                                               | 67.40%          | 74.30%         | 62.90%           |
| Q12. Connect to a Wi-Fi network.                                                                                                    | 66.40%          | 77.00%         | 59.30% ***       |
| Q35. Close games and other applications.                                                                                            | 66.00%          | 66.90%         | 65.50%           |
| Q32. Watch movies and videos.                                                                                                       | 65.00%          | 64.60%         | 65.20%           |
| Q24. Find health information on the Internet.                                                                                       | 64.50%          | 67.70%         | 62.40%           |
| Q36. Delete games and other applications.                                                                                           | 63.40%          | 69.30%         | 59.60%           |
| Q13. Open emails.                                                                                                                   | 59.00%          | 66.50%         | 54.0% ***        |
| Q22. Find information about local community resources on the Internet.                                                              | 53.10%          | 59.90%         | 48.60%           |
| Q16. View pictures sent by email.                                                                                                   | 51.20%          | 60.30%         | 45.3% ***        |
| Q27. Save text and images I find on the internet.                                                                                   | 50.80%          | 56.80%         | 46.80%           |
| Q34. Update games and other applications.                                                                                           | 47.80%          | 52.90%         | 44.50%           |
| Q37. Upgrade device software.                                                                                                       | 47.20%          | 56.40%         | 41.2% ***        |
| Q14. Send emails.                                                                                                                   | 47.10%          | 53.70%         | 42.70%           |
| Q29. Check the date and time of upcoming and prior appointments.                                                                    | 44.80%          | 47.90%         | 42.70%           |
| Q28. Enter events and appointments into a calendar.                                                                                 | 43.10%          | 47.10%         | 40.40%           |
| Q17. Send pictures by email.                                                                                                        | 41.00%          | 47.50%         | 36.80%           |
| Q31. Use the devices online store to find games and other forms of entertainment (e.g. using Apple App Store or Google Play Store). | 40.30%          | 43.20%         | 38.40%           |
| Q30. Set up alerts to remind me of events and appointments.                                                                         | 37.50%          | 42.00%         | 34.50%           |

|                                                                                                                                  |        |        |           |
|----------------------------------------------------------------------------------------------------------------------------------|--------|--------|-----------|
| Q15. Store email addresses in an email address book or contact list.                                                             | 37.30% | 46.30% | 31.5% *** |
| Q26. Bookmark websites to find them again later (make favorites).                                                                | 34.10% | 41.20% | 29.40%    |
| Q33. Read a book.                                                                                                                | 29.00% | 32.30% | 26.90%    |
| Q18. Transfer information (files such as music, pictures, documents) on my mobile device to my computer.                         | 28.20% | 35.40% | 23.5% *** |
| Q20. Store information with a service that lets me View my files from anywhere (e.g. Dropbox, Google Drive, Microsoft Onedrive). | 24.20% | 26.50% | 22.80%    |
| Q19. Transfer information (files such as music, pictures, documents) on my computer to my mobile device.                         | 23.90% | 30.70% | 19.4% *** |

---

#### Notes

\*\*\* As the Bonferroni correction was applied to correct for multiple chi-square tests ( $df = 1$ ), the significance level was set at .0013

Table S4. Differences between participants who never or rarely used Internet and those who used Internet every day

| Variables                                       | a) Never used<br>Internet (n =<br>370) | b) Less than<br>once a month<br>to once a week<br>(n = 75) | c) Every day<br>(n = 573) | F (post-hoc) / $\chi^2$ (df) | p      |
|-------------------------------------------------|----------------------------------------|------------------------------------------------------------|---------------------------|------------------------------|--------|
|                                                 | % / M (SD)                             | % / M (SD)                                                 | % / M (SD)                |                              |        |
| Age                                             | 78.35 (8.80)                           | 71.45 (6.51)                                               | 69.37 (6.89)              | 128.193 (b>a, c>a)           | <0.001 |
| Gender (female)                                 | 72.7%                                  | 73.3%                                                      | 58.6%                     | 22.070 (2)                   | <0.001 |
| Education level                                 |                                        |                                                            |                           | 200.335 (12)                 | <0.001 |
| Never attend                                    | 16.2%                                  | 10.0%                                                      | 2.7%                      |                              |        |
| Primary school                                  | 42.2%                                  | 40.0%                                                      | 16.6%                     |                              |        |
| Secondary school                                | 20.6%                                  | 18.6%                                                      | 17.5%                     |                              |        |
| Associate degree                                | 14.5%                                  | 15.7%                                                      | 33.1%                     |                              |        |
| Bachelor's degree                               | 4.4%                                   | 8.6%                                                       | 10.2%                     |                              |        |
| Master's degree or<br>above                     | 1.5%                                   | 4.3%                                                       | 14.8%                     |                              |        |
| Self-perceived social<br>class                  |                                        |                                                            |                           | 71.000 (10)                  | <0.001 |
| Upper class                                     | 0.6%                                   | 0.0%                                                       | 0.8%                      |                              |        |
| Upper middle class                              | 1.5%                                   | 1.5%                                                       | 5.0%                      |                              |        |
| Middle class                                    | 17.5%                                  | 23.9%                                                      | 33.4%                     |                              |        |
| Lower middle class                              | 17.2%                                  | 14.9%                                                      | 23.9%                     |                              |        |
| Grassroot                                       | 42.8%                                  | 37.3%                                                      | 28.5%                     |                              |        |
| Refuse to answer                                | 20.5%                                  | 22.4%                                                      | 8.3%                      |                              |        |
| Satisfied with current<br>life in the past week | 58.4%                                  | 70.7%                                                      | 76.6%                     | 42.928 (4)                   | <0.001 |
| Feeling empty in daily<br>life in the past week | 20.5%                                  | 17.3%                                                      | 14.8%                     | 33.325 (4)                   | <0.001 |
| Often feeling happy in<br>the past week         | 44.6%                                  | 46.7%                                                      | 54.5%                     | 9.277 (4)                    | 0.055  |
| Self-rated physical<br>health                   | 3.11 (1.01)                            | 3.23 (0.88)                                                | 3.49 (8.46)               | 20.254 (c>a)                 | <0.001 |
| Self-rated mental<br>health                     | 3.42 (0.95)                            | 3.45 (0.93)                                                | 3.79 (0.82)               | 21.429 (c>a, c>b)            | <0.001 |

Table S5. Hierarchical multiple regression predicting self-rated health (SRH) and self-rated mental health (SRMH) (N = 507)

| Variables                   | SRH      |       |          |       | SRMH      |       |           |       |
|-----------------------------|----------|-------|----------|-------|-----------|-------|-----------|-------|
|                             | Model 1  |       | Model 2  |       | Model 1   |       | Model 2   |       |
|                             | $\beta$  | p     | $\beta$  | p     | $\beta$   | p     | $\beta$   | p     |
| Constant                    |          | 0.000 |          | 0.000 |           | 0.000 |           | 0.000 |
| Gender (male)               | −0.005   | 0.915 | 0.006    | 0.902 | 0.026     | 0.573 | 0.050     | 0.288 |
| Education level             | 0.004    | 0.940 | −0.006   | 0.919 | 0.000     | 0.994 | −0.044    | 0.408 |
| Self-perceived social class | −0.188   | 0.000 | −0.176   | 0.001 | −0.274    | 0.000 | −0.243    | 0.000 |
| Age                         | −0.020   | 0.675 | −0.017   | 0.739 | −0.045    | 0.326 | −0.011    | 0.824 |
| Digital skills              |          |       | 0.159    | 0.044 |           |       | 0.232     | 0.003 |
| Internet usage              |          |       | 0.132    | 0.085 |           |       | 0.102     | 0.172 |
| R <sup>2</sup>              | 0.037    |       | 0.046    |       | 0.079     |       | 0.100     |       |
| Adjusted R <sup>2</sup>     | 0.028    |       | 0.033    |       | 0.071     |       | 0.088     |       |
| F                           | 4.294 ** |       | 3.597 ** |       | 9.633 *** |       | 8.231 *** |       |
| $\Delta R^2$                | 0.037    |       | 0.009    |       | 0.079     |       | 0.021     |       |
| $\Delta F$                  | 4.294 ** |       | 2.160    |       | 9.633 *** |       | 5.075 **  |       |

\*\*  $p < .01$  \*\*\*  $p < .001$
